# Supplementary material for: Food Insecurity Is Associated with the Quality of Diet of Non-Institutionalized Older Adults from a Southern Chilean Commune: A Cross-Sectional Study
Source: MDPI journal article supplement (doi:10.3390/nu14010036), 2021-12-23
Supplement: s1 [file s1]

**Supplementary Table S1.** Equivalences of portions (grams) and homemade measures

| Food group                                          | Grams per portion | Portion in homemade measure |
|-----------------------------------------------------|-------------------|-----------------------------|
| <b>Cereal and derivatives</b>                       |                   |                             |
| Cooked rice                                         | 130 g             | $\frac{3}{4}$ cup           |
| Cooked pasta                                        | 130 g             | $\frac{3}{4}$ cup           |
| <i>Marraqueta</i> bread                             | 50 g              | $\frac{1}{2}$ unit          |
| White bread (manufactured)                          | 60 g              | 2 $\frac{1}{2}$ slices      |
| Sweetened breakfast cereal                          | 40 g              | 1 cup                       |
| High-fiber unsweetened breakfast cereal             | 50 g              | 1 $\frac{1}{4}$ cup         |
| Puffed rice                                         | 70 g              | 2 cups                      |
| Crackers                                            | 40 g              | 7 units                     |
| <b>Vegetables</b>                                   |                   |                             |
| Lettuce                                             | 50 g              | 1 cup                       |
| Cucumber salad                                      | 100 g             | $\frac{1}{2}$ unit          |
| Cabbage                                             | 50 g              | 1 cup                       |
| Arugula                                             | 50 g              | 1 cup                       |
| Raw spinach                                         | 50 g              | 1 cup                       |
| Tomato                                              | 120 g             | 1 regular unit              |
| Grated raw carrot                                   | 60 g              | 1 cup                       |
| Raw onions                                          | 60 g              | $\frac{3}{4}$ cup           |
| Green beans                                         | 70 g              | $\frac{3}{4}$ cup           |
| <b>Fruits and juice</b>                             |                   |                             |
| Apple                                               | 100 g             | 1 small unit                |
| Pear                                                | 100 g             | 1 small unit                |
| Orange                                              | 120 g             | 1 regular unit              |
| Banana                                              | 60 g              | $\frac{1}{2}$ unit          |
| Peach                                               | 130 g             | 1 regular unit              |
| <b>Dairy and derivatives</b>                        |                   |                             |
| Milk<br>whole/skimmed/semi-skimmed                  | 200 ml            | 1 cup                       |
| Milk powder<br>whole/skimmed/semi-skimmed           | 20 g              | 1 tablespoon                |
| Yoghurt                                             | 125 g             | 1 unit (regular pot)        |
| <i>Quesillo</i> and fresh cheese                    | 90 g              | 1 slice (4 cm)              |
| <i>Chanco</i> , <i>mantecoso</i> , and gouda cheese | 30 g              | 2 thin slices               |

|                                                                                                                               |              |                                       |
|-------------------------------------------------------------------------------------------------------------------------------|--------------|---------------------------------------|
| Cream cheese                                                                                                                  | 30 g         | 1 ½ tablespoon                        |
| <b>Fats and oils</b>                                                                                                          |              |                                       |
| <i>Maravilla</i> , corn, soy, olive, and grape seed oil                                                                       | 5 g          | 1 teaspoon                            |
| Margarine                                                                                                                     | 6 g          | 1 teaspoon                            |
| Mayonnaise                                                                                                                    | 12 g         | 1 tablespoon                          |
| Light mayonnaise                                                                                                              | 18 g         | 1 ½ tablespoon                        |
| <b>Meats and fish</b>                                                                                                         |              |                                       |
| Low-fat                                                                                                                       |              |                                       |
| Bovine ( <i>Abastero</i> , stake, loin, black post, entrails, tartar, among others)                                           | 50 g         | 1 piece (6 x 6 x 1 cm)                |
| Chicken                                                                                                                       | 50 g         | 1 piece (6 x 6 x 1 cm)                |
| Turkey breast (cooked or uncooked)                                                                                            | 50 g<br>60 g | 1 piece (6 x 6 x 1 cm)<br>Or 3 slices |
| Pork loin, pork pulp                                                                                                          | 50 g         | 1 piece (6 x 6 x 1 cm)                |
| Tuna and mackerel                                                                                                             | 60 g         | 1/3 cup                               |
| Fish ( <i>Reineta</i> , conger, corvina, jurel, <i>lenguado</i> , <i>merluza</i> , <i>pejegallo</i> , <i>pejerrey</i> , tila) | 80 g         | 1 piece (10 x 6 x 1 cm)               |
| Seafood (shrimp, ribbed mussels, mussels)                                                                                     | 80 g         | 8 units                               |
| Eggs                                                                                                                          | 75 g         | 1,5 units                             |
| High-fat                                                                                                                      |              |                                       |
| Bovine (ossobuco, <i>huachalomo</i> , vetted loin, strip roast, <i>plateada</i> , top sirloin, butcher roast, ribs)           | 50 g         | 1 piece (6 x 6 x 1 cm)                |
| Pork chop and pork casserole                                                                                                  | 50 g         | 1 piece (6 x 6 x 1 cm)                |
| Fish in oil (Tuna, jurel)                                                                                                     | 50 g         | 1/3 cup                               |
| Fish (salmon, <i>cojinova</i> , trout, jurel, grouper, sawfish)                                                               | 80 g         | 1 piece (10 x 6 x 1 cm)               |
| Ribbed mussels in oil                                                                                                         | 60 g         | 6 units                               |
| Mussels in oil                                                                                                                | 60 g         | 9 units                               |
| <b>Legumes and dry fruit</b>                                                                                                  |              |                                       |
| Cooked legumes                                                                                                                | 140 g        | ¾ cup                                 |
| Almonds                                                                                                                       | 8 g          | 8 units                               |
| Hazelnuts                                                                                                                     | 8 g          | 6 units                               |
| Peanuts                                                                                                                       | 8 g          | 10 units                              |
| Pistachios                                                                                                                    | 8 g          | 10 units                              |
| Chestnuts                                                                                                                     | 8 g          | 5 units                               |
| <b>Sausages and cold meats</b>                                                                                                |              |                                       |
| Mortadella                                                                                                                    | 40 g         | 2 ½ slices                            |

|                                                        |        |                      |
|--------------------------------------------------------|--------|----------------------|
| Ham                                                    | 40 g   | 1 ¼ slice            |
| Spanish sausage                                        | 30 g   | ¼ unit               |
| Chicken nuggets                                        | 50 g   | 2 ½ units            |
| Pate                                                   | 30 g   | 2 heaped tablespoons |
| Hotdog (chicken, turkey, pork)                         | 50 g   | 1 unit               |
| <b>Sweets</b>                                          |        |                      |
| Ice cream                                              | 100 ml | ½ cup                |
| Honeybee                                               | 5 g    | 1 teaspoon           |
| Cacao powder                                           | 5 g    | 1 teaspoon           |
| Cakes, Berliner, sponge cake                           | 40 g   | 1 unit               |
| Chocolates                                             | 30 g   | 2 squares            |
| <b>Others</b>                                          |        |                      |
| Sugary drink                                           | 200 ml | 1 glass              |
| Fried processed foods ( <i>sopaipillas</i> , chips)    | 80 g   | 1 commercial bag     |
| Home-made French chips                                 | 150 g  | 1 cup                |
| Salted snacks (Industrialized snacks, <i>ramitas</i> ) | 25 g   | 2 cups               |

Reference: Ratner, R.; Aicardi, V.; Allende, J. *Manual de porciones de intercambio para Chile*; 2nd ed.; Santiago de Chile, 2021.

**Supplementary Table S2.** Score by food group of the Healthy Eating Index

| Food group                    | Maximum score of 10   | Score of 6 | Score of 2.5 | Score of 0            |
|-------------------------------|-----------------------|------------|--------------|-----------------------|
| <b>Daily consumption</b>      |                       |            |              |                       |
| 1. Cereals and derivatives    | Daily                 | Weekly     | Occasional   | Never or almost never |
| 2. Vegetables                 | Daily                 | Weekly     | Occasional   | Never or almost never |
| 3. Fruits and juice           | Daily                 | Weekly     | Occasional   | Never or almost never |
| 4. Dairy and derivates        | Daily                 | Weekly     | Occasional   | Never or almost never |
| 5. Fats and oils              | Daily                 | Weekly     | Occasional   | Never or almost never |
| <b>Weekly consumption</b>     |                       |            |              |                       |
| 6. Meats and fish             | Weekly                | Occasional | Daily        | Never or almost never |
| 7. Legumes and dry fruit      | Weekly                | Occasional | Daily        | Never or almost never |
| <b>Occasional consumption</b> |                       |            |              |                       |
| 8. Sausages and cold meats    | Never or almost never | Occasional | Weekly       | Daily                 |
| 9. Sweets                     | Never or almost never | Occasional | Weekly       | Daily                 |
| 10. Others                    | Never or almost never | Occasional | Weekly       | Daily                 |
